# Supplementary material for: Physics-based prediction of moisture-capture properties of hydrogels
Source: Research Square preprint supplement (doi:10.21203/rs.3.rs-4487027/v1), 2024-06-18
Supplement: Supplementary file 1 [file b4e4b7d62d49721b1eb401eb.docx]

Supporting Information

**Physics-based prediction of moisture-capture properties of hydrogels**

Carlos D. Díaz-Marín1*, Lorenzo Masetti1,2, Miles A. Roper1, Kezia E. Hector3, Yang Zhong1, Zhengmao Lu4, Omer Caylan1, Gustav Graeber1, Jeffrey C. Grossman4

1Department of Mechanical Engineering, Massachusetts Institute of Technology, Cambridge, Massachusetts 02139, United States;

2Department of Mechanical and Process Engineering, ETH Zurich, Zurich, Switzerland

3Department of Chemical Engineering, Massachusetts Institute of Technology, Cambridge, Massachusetts 02139, United States;

4Department of Materials Science and Engineering, Massachusetts Institute of Technology, Cambridge, Massachusetts 02139, United States;

E-mail: cddiaz@mit.edu

**Supplementary Note 1: Characterization of hydrogel-salt composites**


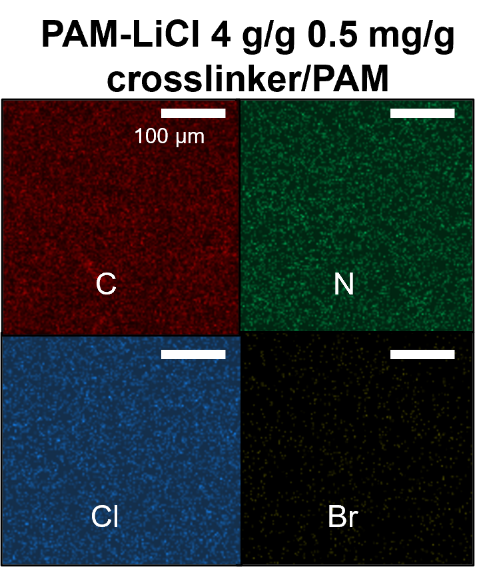


**Figure S1. Composition of PAM-LiCl with lower crosslinking.** Electron dispersive x-ray spectroscopy results of a PAM-LiCl hydrogel with 4 g of salt per g of polymer and 0.5 mg of crosslinker per g of polymer. The hydrogel contains carbon, nitrogen, and chloride as expected and similarly to the hydrogels with higher crosslinking (Fig. 2h).

We characterized the elastic modulus of the samples with different crosslinking density by compressions tests. We synthesized PAM-LiCl 4 g/g samples with 0.1 and 10 mg/g crosslinker/PAM in petri dishes (Falcon, 35 x 10 mm). We carried out compression tests of the as-synthesized samples using a TA.XT plus Texture Analyser, simultaneously measuring displacement and force. We obtained the stress and strain curves (Fig. S2) by measuring the thickness and diameter of the samples in the as-synthesized state.


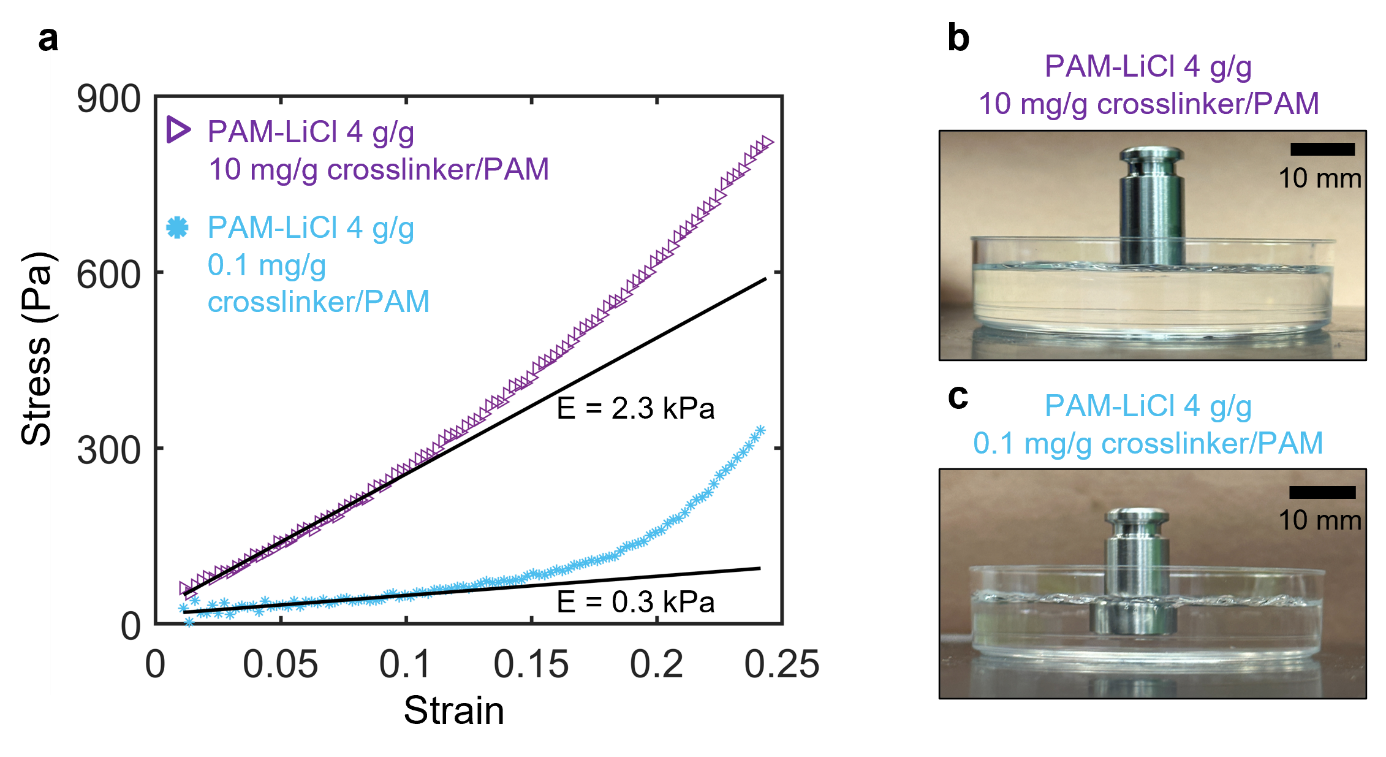


**Figure S2. Mechanical properties of hydrogel-salt composites with different crosslinking density.** a) Stress-strain curves for PAM-LiCl 4 g/g hydrogels with crosslinking contents of 10 mg/g and 0.1 mg/g. We calculate the elastic moduli from the linear portion of the stress-strain curves. The hydrogel with the higher crosslinker content had a higher modulus of 2.3 kPa, while the hydrogel with the lower crosslinking content had a modulus of 0.3 kPa. The higher modulus with higher crosslinking density agrees with previous literature.1 As a result of the different mechanical properties b) the stiffer hydrogel does not significantly deform when a weight of 10 grams is applied on top, c) in contrast with the lower stiffness hydrogel.

**Supplementary Note 2: Thermodynamic model for hydrogel-salt composites**

Here we develop a thermodynamic model for the Gibbs free energy change of a hydrogel-salt composite, . Specifically, we define as the Gibbs free energy per unit of polymer volume. We then use this Gibbs Free Energy to estimate the water chemical potential and sorption enthalpy in hydrogels. We describe the hydrogel in terms of its molar concentration of water, ions, and polymer, , , and , respectively, where corresponds to the i-th ion and all concentrations are here defined relative to the volume of polymer.

We can write the volume fractions of water, the i-th ion, and polymer, , , and , as

|  | (S1) |
| --- | --- |
|  | (S2) |
|  | (S3) |

where is the volume of a mole of water and is the volume of the i-th ion. We note that .

We write the Gibbs free energy of the hydrogel-salt composite following the Flory-Rehner theory, as the sum of an entropic term due to mixing between the polymer, water, and ions, , the enthalpy of mixing between these components, , and the Gibbs free energy related to the elasticity, .2

|  | (S4) |
| --- | --- |

This description did not express the Gibbs free energy in terms of its natural thermodynamic variables: pressure and concentration.2 Chen had reformulated the Flory-Rehner theory using Helmholz free energy of the combined hydrogel and ambient and identified that the elastic energy term is related to the pressure inside the hydrogel.2 The increased pressure can in principle lead to different thermodynamic properties of water inside the hydrogel, such as a reduced latent heat.2 However, as discussed in Supplementary Note S4, this effect is small under the conditions studied here. As such, we will continue to use the Flory-Rehner notation.3

In Eqn. S4, the first two terms would also be present in a solution that contains polymer, water, and ions, while the last term is only present for either physically or chemically crosslinked gels.3

The entropic mixing term, , can be expressed by considering mixing between the polymer, water, and ions.4

|  | (S5) |
| --- | --- |

where is the ideal gas constant and is the absolute temperature.

The enthalpic term can be expressed in three terms for the pairwise interactions between water, polymer, and ions.2–4

|  | (S6) |
| --- | --- |

where the first term, , corresponds to polymer-water mixing enthalpy, the second term, , corresponds to polymer-ion mixing enthalpy, and the last term, , corresponds to water-ions mixing enthalpy. These energetic terms are captured by the Flory chi parameter between polymer and water, ,3 the Flory chi parameter between the polymer and i-th ion, ,2 and the activity coefficients of water and the i-th ion in the salt solution, and .4 In writing Eqn. S6, we have considered a non-polyelectrolyte hydrogel (i.e. one without charges in its polymer structure) and we considered a simplified treatment for the polymer-ion interactions as captured only by the respective Flory chi parameter.2 Furthermore, we have considered that all the nonidealities of ion-water mixing arise due to enthalpy. This allowed us to neglect non-ideal entropy of mixing for the water and ions, consistent with Eqn. S5.

Lastly, we write the elastic term following Flory-Rehner theory as5,6

|  | (S7) |
| --- | --- |

where is the crosslinking density of the hydrogel. , , and are the hydrogel stretches along three perpendicular directions x, y, and z. accounts for the change in configuration entropy due to chain extension. accounts for the change in entropy due to volume changes for the entire hydrogel. The last term arises from the incompressibility constraint, which can be treated with a Lagrange multiplier, and which sets that .6

We can combine Eqns. S4-S7 to write the Gibbs free energy of the hydrogel-salt composite. To simplify the expression, we will assume that the hydrogel expands only in the thickness direction, which we will consider the x-direction. This is consistent with common 1D expansion in water sorption applications7 and is representative of the conditions of our experiments. Therefore, only is a variable. The stretches in the y- and z- directions are constant, taken as . We also consider that the degree of polymerization is large. Then, the polymer chains have many monomers, but there are few polymer molecules. So we can consider . With these assumptions, is given by:

|  | (S8) |
| --- | --- |

We use the previous thermodynamic framework to calculate the uptake and the enthalpy of sorption of hydrogel-salt composites as a function of hydrogel composition and of ambient conditions.

**Supplementary Note 3: Thermodynamic model for uptake of hydrogel-salt composites**

To derive expressions for the uptake, we note that this corresponds to an equilibrium property at which there is no mass transfer of moisture between the hydrogel and the ambient. The thermodynamic condition for mass transfer equilibrium is the equality of chemical potential.4 Therefore, for a hydrogel-salt composite in equilibrium with humid air, the chemical potential of water in the hydrogel, , and in the humid air, , must be identical:

|  | (S9) |
| --- | --- |

The chemical potential of water vapor in the air is given by4

|  | (S10) |
| --- | --- |

where is the chemical potential of pure water, is the partial pressure of water vapor in the air, and is the saturation pressure of water. is the relative humidity.

The chemical potential of water in the hydrogel can be calculated from the Gibbs free energy of the hydrogel-salt composite as4

|  | (S11) |
| --- | --- |

From Eqns. S8 and S11 we can then write:

|  | (S12) |
| --- | --- |

where we neglected the changes of the Flory chi parameters with the water concentration as these are typically small.8

We can further simplify Eqn. S12 by noting that where we considered , i.e. that the volume of ions and water molecules is similar. is the mole fraction of water relative to the salt solution contained in the hydrogel. We also use the Gibbs-Duhem relation .9

|  | (S13) |
| --- | --- |

where in the last equality we introduced four chemical potential terms accounting for the interactions between polymer and water, water and ions, polymer and ions, and elasticity, respectively. We define these as

|  | (S14) |
| --- | --- |
|  | (S15) |

|  | (S16) |
| --- | --- |
|  | (S17) |

with these definitions is identical to the chemical potential of water in a salt solution,4 becomes zero if there are no ions (), and becomes zero if there are no crosslinks (). We also note that if there are no ions (), the chemical potential of water in the hydrogel (Eqn. S13) becomes identical to the expression used to predict swelling behavior.6

In order to identify the dominant interactions in the hydrogel, which dictate the hydrogel uptake, we estimate all previous chemical potential terms. We considered the properties of polyacrylamide as the polymer and lithium chloride as the salt as a starting point (Fig. S3a), including the interaction parameter and the crosslinking density.8 However, the conclusions regarding the dominant chemical potential hold for values of interactions parameters and crosslinking density as we show through our parametric analysis (Fig. S3a-d). In this parametric analysis, the interaction parameter was increased in an order of magnitude over the base case, representing an extreme case of enthalpic repulsion.3 The crosslinking density was increased in four orders of magnitude, representing an extreme increase in number of crosslinks.10 Table S1 lists the values of the parameters used in our base estimation and Figure S3 shows a comparison of the different chemical potential terms.


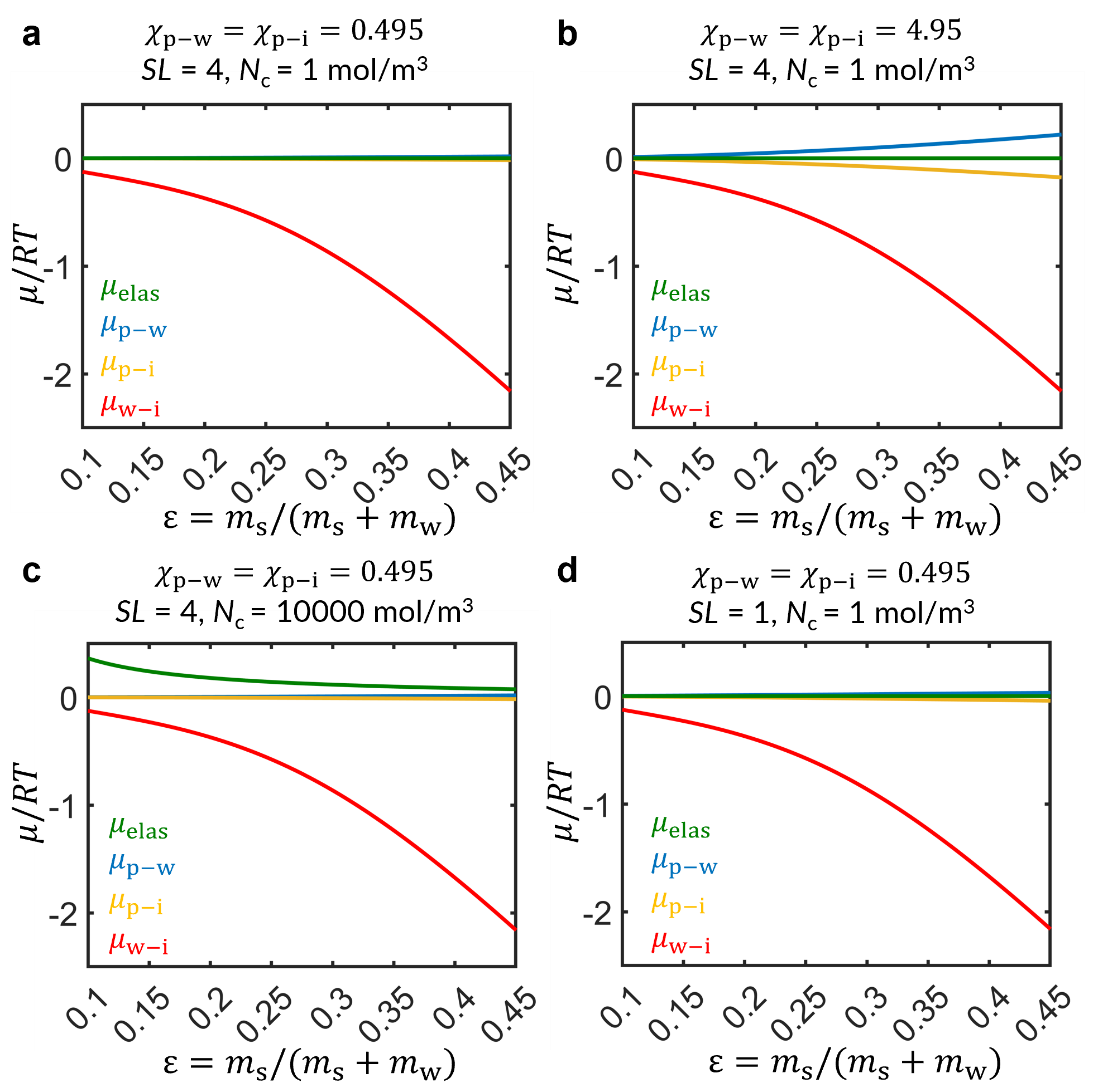


**Figure S3. Chemical potentials contributing to the chemical potential of water in the hydrogel.** Chemical potential terms, as described by Eqn. S14-17, due to elasticity, polymer-water interactions, polymer-ion interactions, and water-ion interactions for different values of interaction parameters *χ*, salt loading *SL*, and crosslinking density *N*C. For all parameters considered the water-ion interactions are the dominant term. The salt mass fractions shown translate into a relative humidity range between 12% and 88%.

Our analyses show that across all parameters considered the chemical potential due to water-ion interactions is the dominant one. This allows us to approximate . Combining this with Eqn. S10 and S15, we obtain:

|  | (S18) |
| --- | --- |

Eqn. S18 can be used to obtain the water to salt mass fraction as a function of humidity

|  | (S16) |
| --- | --- |

where *i* is the number of ions in the salt. Finally, by accounting for the additional polymer weight, we can obtain the uptake *U* as

|  | (S17) |
| --- | --- |

The mass-based uptake, defined in Eqns. S16 and S17, will be lower for salts with higher molar mass. Alternatively, we can define a molar uptake for salt solutions as , which more directly shows the interaction of ions with water molecules, without penalizing heavier ions.

Table S1. Variables used to calculate chemical potentials

| Variable | Value used | Reference |
| --- | --- | --- |
|  | 1.8 x 10-5 m3/mol | Calculated as , where is the molar mass of water (0.018 kg/mol) and is the density of water (1000 kg/m3) |
|  | 1.8 x 10-5 m3/mol | Considered identical to that of water, which is consistent with the assumptions of lattice models.3 |
|  | 1.06 x 105 mol/m3 | Calculated as *,* where *SL* is the salt to polymer mass ratio, taken as 4, is the density of polymer, taken as 1122 kg/m3 considering polyacrylamide, and is the molar mass of salt, taken as 0.0424 kg/mol, considering lithium chloride |
|  | 0.495 | As measured in our previous work8 |
|  | Function of the water mole fraction relative to the salt solution | Using the correlation to experimental data developed by Conde11 |
|  | 0.495 | Considered to be of the same value as the interaction between water and polymer2 |
|  | 1 mol/m3 | As estimated in our previous work from our elastic modulus measurements8 |
|  | 3.05 x 105 mol/m3 | Calculated as , where is the mass fraction of salt in the salt solution in the driest state considered for the hydrogel. We considered , as this is the approximate mass fraction when lithium chloride deliquesces.11 |
|  | 2.18 | Calculated from |
|  | Function of the water concentration | Calculated from |

**Supplementary Note 4: Thermodynamic model for enthalpy of desorption of hydrogel-salt composites**

We use the thermodynamic model we developed to calculate expressions for the enthalpy of sorption of hydrogel-salt composites. The enthalpy of sorption corresponds to the heat released as a mole of water is captured into sorbent. For a hydrogel-salt composite, this heat is the sum of the vaporization enthalpy and a term related to the mixing enthalpy:

|  | (S21) |
| --- | --- |

Eqn. S21 can be interpreted by considering the sorption process as a combination of, first, condensation of the water and then, mixing of the water into the hydrogel-salt composite. Combining Eqns. S6 and S21,

|  | (S22) |
| --- | --- |

where we used the Gibbs-Duhem relationship (9) and we neglected the small changes of Flory parameter with composition.8 In Eqn. S22 we defined three enthalpy terms, , , , corresponding to polymer-water, polymer-ion, and water-ion interactions, respectively. These are given as

|  | (S23) |
| --- | --- |
|  | (S24) |
|  | (S25) |

We calculate these different enthalpy terms and compare them to demonstrate that the sorption enthalpy is dominated by vaporization enthalpy and the water-ion interaction (Figure S4). We estimate all enthalpy terms using the parameters listed in Table S1, which correspond to the properties of lithium chloride and polyacrylamide (Figure S4a). However, even for other values of interaction parameter and salt loading, the water-ion enthalpy dominates (Figure S4b and S4c).


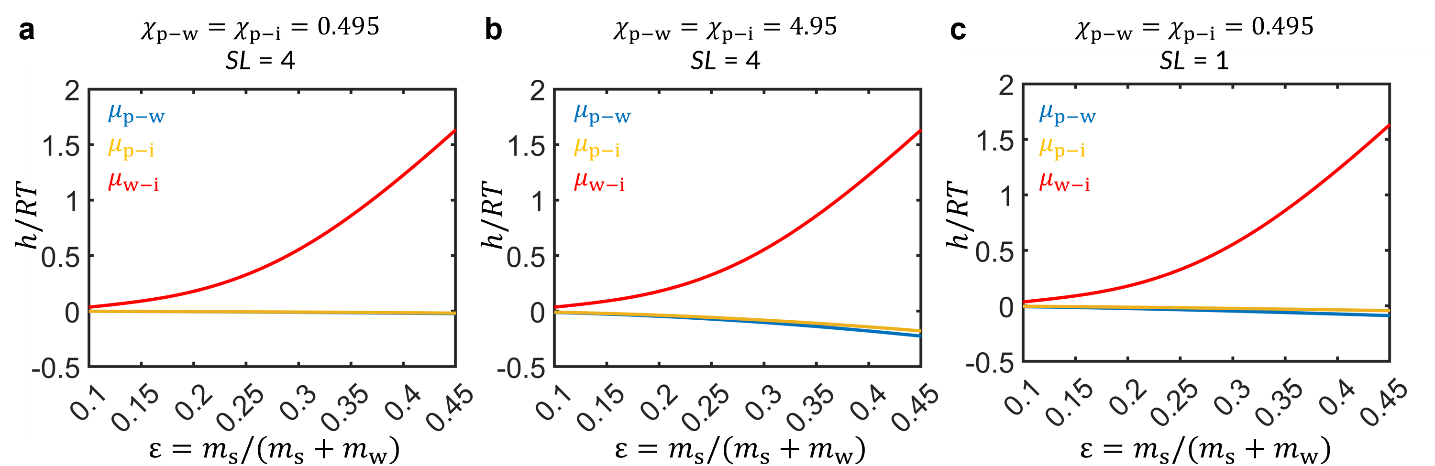


**Figure S4. Enthalpies contributing to sorption enthalpy of water from the hydrogel.** Sorption enthalpy terms, as described by Eqn. S23-25, due to polymer-water interactions, polymer-ion interactions, and water-ion interactions for different values of interaction parameters *χ* and salt loading *SL*. For all parameters considered the water-ion interactions are the dominant term. The salt mass fractions shown translate into a relative humidity range between 12% and 88%.

As a consequence, we can write

|  | (S26) |
| --- | --- |

where we have chosen not to write as given in Eqn. S25, but instead to use literature values for the mixing enthalpy of water and salts11. By doing this, our theory predictions account for nonideal entropy of mixing effects, which Eqn. S25 neglects.

In Eqn. S26 we treat the vaporization enthalpy of water from a hydrogel as identical to that bulk water. This neglects the possible latent heat reduction due to the higher internal pressure inside the hydrogel, which holds for the intermediate-to-low polymer volume fractions considered in this work (<0.5 typically for hydrogels with salts).2

**Supplementary Note 5: Model for convection-limited moisture absorption and desorption into hydrogel-salt composites**

Here we derive the governing equations predicting the dynamic absorption and desorption of moisture into hydrogel-salt composites. We consider that moisture is transferred from the ambient to the hydrogel driven by the vapor concentration difference between the ambient and over hydrogel, .

|  | (S27) |
| --- | --- |

where is the saturation pressure of water. In writing Eqn. S27 we considered that the vapor concentration over the hydrogel, , is identical to the vapor concentration over a salt solution.12 This follows from our thermodynamic derivation (Supplementary Note S2) which showed that the chemical potential of water in the hydrogel-salt composite can be approximated as the chemical potential of water in a salt solution. Additionally, by writing the vapor concentration over the hydrogel in terms the activity of the salt solution, , we assumed that at the interface, the activity of water inside the hydrogel and in the vapor phase is identical.

The molar flux of moisture into/from the hydrogel, (mol/m2/s), is proportional to the concentration difference, ,13

|  | (S28) |
| --- | --- |

where *g* is the mass transfer convection coefficient (m/s).

We describe the water content inside the hydrogel in terms of its molar concentration relative to the hydrogel volume in the most desorbed state, . The total mass of water inside the hydrogel at any given time, , will then be

|  | (S29) |
| --- | --- |

where is the cross-sectional area of the hydrogel and is the initial thickness of the hydrogel at its most desorbed state (e.g. *RH* = 20% in Fig. 5).

We consider mass conservation of water inside the hydrogel, where all the mass that is gained/lost comes from condensation/evaporation of water as described by Eqn. S28:

|  | (S30) |
| --- | --- |

Combining Eqns. S28-S30 we obtain

|  | (S31) |
| --- | --- |

which is the governing equation for our dynamic absorption and desorption model (Eqn. 8 in the main text).

Lastly, we highlight that to solve Eqn. S31, we used experimental correlations previously reported in literature for the dependence of the water activity on water concentration, .11,14 Additionally, we considered the salt solution density as constant at its value at *RH* = 20%. These, combined with the independent measurement of the convection coefficient (see Supplementary Note S6 for details), allowed us to predict the evolution of hydrogel uptake as a function of time and humidity without the need for empirical fitting parameters.

**Supplementary Note 6: Measurement of convection mass transfer coefficient *g* via evaporation measurements**

We performed evaporation measurements to calculate the mass transfer convection coefficient in the environmental chamber used in our experiments, as described in our previous work.12 For this, a petri dish with the same dimensions as those used in the absorption experiments was placed on a mass balance in the environmental chamber at 25°C and a controlled humidity (20%, 30%, 50%, 70%). The mass of water was tracked over time as shown in Figure S5a. The mass decreased linearly indicating a constant evaporation rate, which we calculated as the slope of the mass change curves.


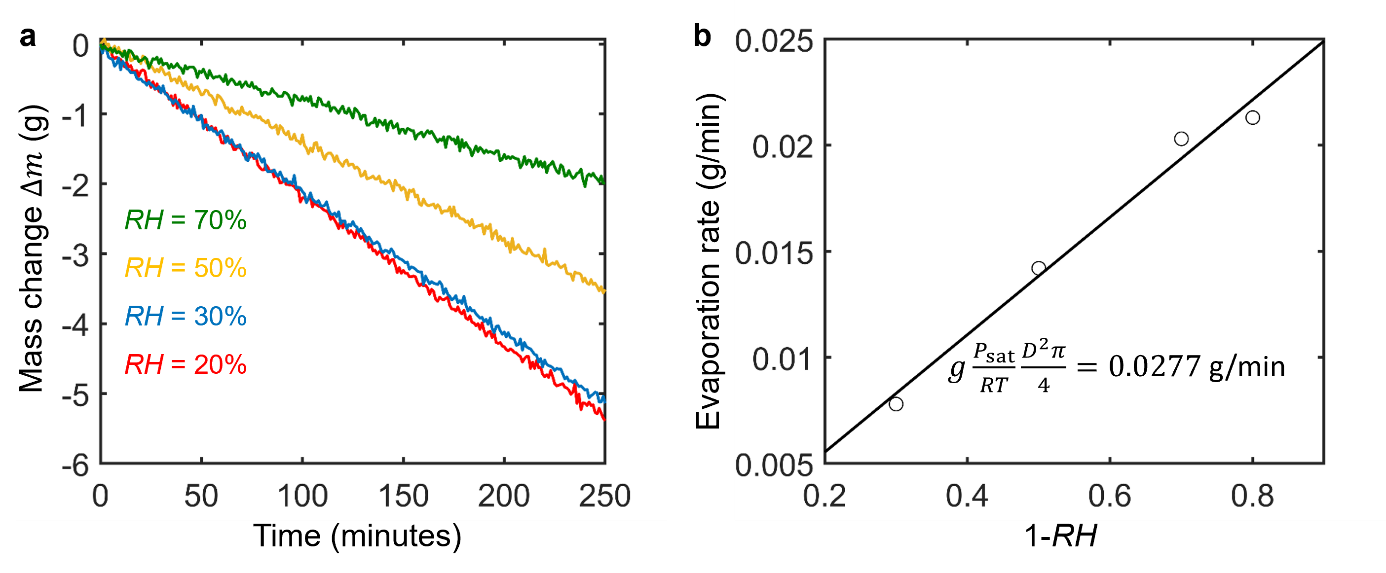


**Figure S5. Water evaporation experiments to calculate the mass transfer convection coefficient.** (a) Mass change over time for evaporation of water in an environmental chamber at controlled humidity as measured in our previous work.12 The evaporation rate can be calculated as the slope of the mass change curves. (b) Evaporation rate at different humidities as a function of . We used a linear fit to the data to calculate the mass transfer coefficient.

We consider Eqn. S28 for pure water () to calculate the mass transfer convection coefficient, , based on the evaporation rate at different humidities

|  | (S32) |
| --- | --- |

Therefore, we can estimate from the slope of an evaporation rate vs. (1-*RH*) plot. This slope has a value of g/min. From this, we calculate the mass transfer coefficient to be = 0.0095. In this analysis we assumed that the mass transfer convection coefficient, and, therefore, the vapor boundary layer thickness, is independent of vapor concentrations. This assumption is corroborated by the linear dependence of evaporation rate and (1-*RH*) in Fig. S5b.

**Supplementary Note 7: Measured initial hydrogel thicknesses for kinetics experiments**

We measured the thickness of the hydrogel-salt composites after they reached equilibrated, observed by negligible hydrogel mass changes, at 20% relative humidity inside the environmental chamber (Fig. 5a). We measured the thickness at different locations along the hydrogel. The average thickness and standard deviation of our measurements are reported in Table S2.

Table S2. Thickness of samples used in kinetics experiments.

| Hydrogel | Average thickness (mm) | Thickness standard deviation (mm) |
| --- | --- | --- |
| PAM-LiCl 4 g/g | 2.34 | 0.17 |
| PAM-LiCl 2 g/g | 2.16 | 0.30 |
| PVA-LiCl 4 g/g | 2.15 | 0.51 |
| PAM-LiBr 4 g/g | 1.60 | 0.08 |
| PAM-LiCl 4 g/g, 0.1 mg/g crosslinker/PAM | 1.94 | 0.46 |
| PAM-LiCl 4 g/g, 10 mg/g crosslinker/PAM | 1.80 | 0.08 |

**Supplementary Note 8: Dynamic absorption and desorption of hydrogel-salt composites with different crosslinking content**


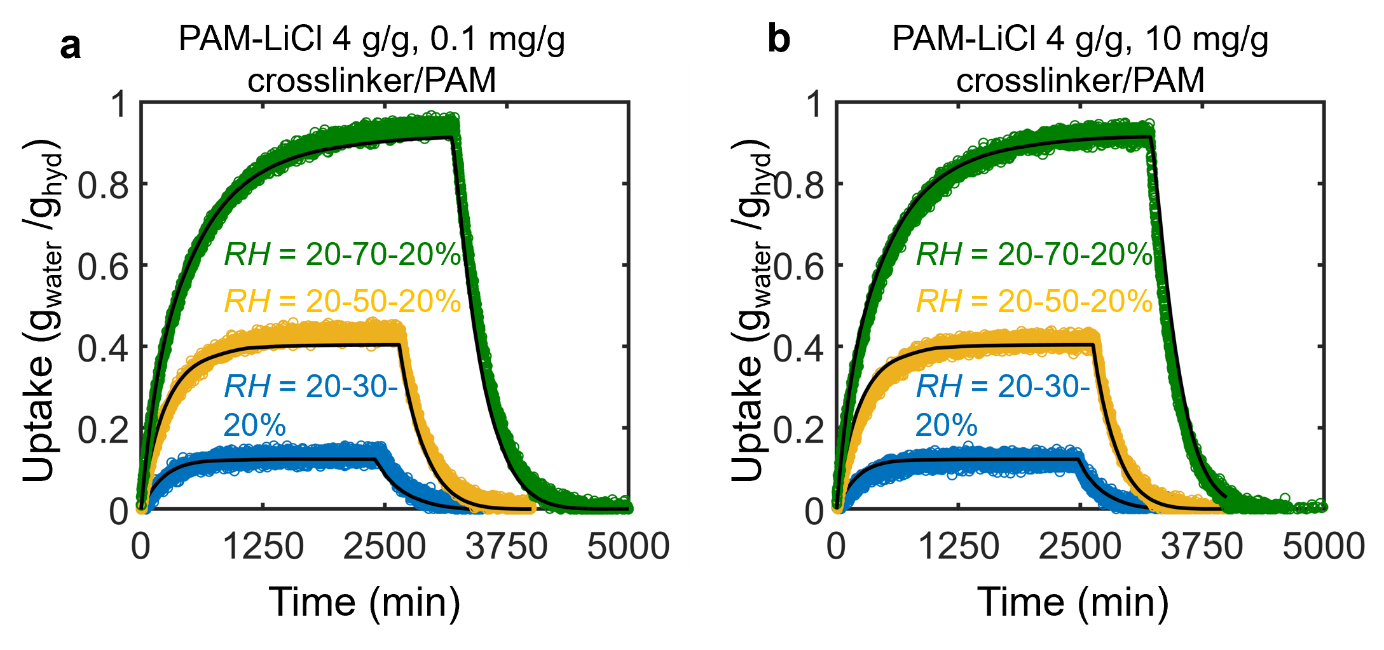


**Figure S6. Absorption and desorption of hydrogel-salt composites with different crosslinking density.** Absorption and desorption of moisture into PAM-LiCl 4 g/g hydrogels starting from *RH* = 20%, then going to higher relative humidities of 30%, 50%, or 70%, and finally ending at *RH* = 20%. Model and experiments agree well for both a hydrogel with a) 0.1 mg of crosslinker per g of PAM and b) 10 mg crosslinker per g of PAM. The crosslinking density does not impact the absorption-desorption process.

**Supplementary Note 9: Calculation of absorption and desorption timescales via exponential fitting**

We calculated timescales for absorption and desorption by fitting the uptake as a function of time obtained from our model to exponential functions. 15–17 For absorption, we fitted the uptake, , to the following equation

|  | (S32) |
| --- | --- |

where is the equilibrium uptake and *τ*abs is the absorption timescale. Eqn. S32 represents a growing uptake which asymptotically tends to its equilibrium value.

For desorption, we fitted the uptake to

|  |  |
| --- | --- |
|  | (S33) |

where *τ*des is the desorption timescale. Eqn. S33 represents a decreasing uptake which starts at its equilibrium value, , and asymptotically tends to zero.

Using the uptake and equilibrium uptake from our models, we obtained absorption and desorption timescales using Eqns. S32 and S33, respectively. These timescales are a measure of the speed of the water capture process, which allows us to quantify the effect of humidity, salt content, and salt type in the absorption-desorption kinetics.

**Supplementary Note 10: Linearized and ideal moisture capture**

Here we consider the salt solution inside the hydrogel as an ideal solution () and linearize the corresponding governing equation. We start from Eqn. 8 with and ,

|  | (S34) |
| --- | --- |

In equilibrium, the vapor flux into/from the hydrogel is zero. Therefore, the equilibrium water concentration, , satisfies

|  | (S35) |
| --- | --- |

Combining Eqns. S34 and S35

|  | (S36) |
| --- | --- |

We can rewrite Eqn. S36 in terms of the difference between the equilibrium water concentration and the actual water concentration, ,

|  | (S37) |
| --- | --- |

We linearize Eqn. S37 in terms of

|  | (S38) |
| --- | --- |

corresponding to Eqn. 9 of the main text.

Eqn. S38 is a simplified linear equation for the water capture process of a hydrogel-salt composite where the salt is considered an ideal solution and valid for small .

**Supplementary Note 11: Theoretical scaling of the absorption and desorption timescale**

Here we derive a theoretical scaling for the absorption and desorption timescales based on our convection-limited description of moisture capture by hydrogel-salt composites.

We start from our governing equation, Eqn. 8 in the main text.

|  | (S39) |
| --- | --- |

From a scaling perspective, we consider and , where is the timescale of the absorption-desorption process under our convection-limited description. We use the previous scalings in Eqn. S39 to solve for

|  | (S40) |
| --- | --- |

The last factor, , depends on the humidity, salt type, and content in the hydrogel. We therefore replace this term by to obtain

|  | (S41) |
| --- | --- |

corresponding to Eqn. 11 of the main text.

**Supplementary Note 12: Calibration and estimation of error**

Prior to the measurement of the sorption enthalpies, we performed several calibrations of the temperature and heat flow in the TGA-DSC machine to ensure accurate measurements. Specifically, we performed the following steps to ensure calibration of the temperature and heat flow at temperatures close to room temperature and higher temperatures.

1. First, we measured the melting point and enthalpy of indium. We used the measured values of melting temperature and enthalpy to adjust the machine calibration to match these theoretical results. Since indium melts at a relatively high temperature (>150 °C), this ensured calibration of temperature and heat flow at high temperature, but it did not guarantee calibration at room temperature.18
2. Secondly, we measured the melting point of phenyl salicylate. We used this melting point (~40° C) to calibrate the temperature measurements at conditions close to room temperature.19 We note that phenyl salicylate is hygroscopic and, therefore, it might contain moisture in its initial condition which is difficult to remove without melting it. As a consequence, the melting enthalpy of phenyl salicylate was not used in the calibration since the initial mass of phenyl salicylate was not accurately known.
3. Thirdly, we measured the enthalpy of vaporization of water three separate times at a constant temperature. We highlight that these values (1800-2000 kJ/kg) were all lower than the enthalpy of vaporization of water (~2400 kJ/kg). We then used the average measured value to calibrate the heat flow measurement at room temperature. This essentially allowed scaled the heat flux measurements such that the latent heat corresponds to the expected value of ~2400 kJ/kg.
4. Fourthly, we measured the enthalpy of vaporization of water three more times to ensure the self-consistency of our calibration. We measured values of 2436, 2464, and 2460 kJ/kg, which matched accurately the expected value of 2441 kJ/kg.
5. Lastly, we measured the enthalpy of vaporization of isopropyl alcohol at room temperature to check the accuracy of our measurements against a known substance. We measured a value of 767 kJ/kg in good agreement with the expected value of 758 kJ/kg at 30° C.20

We note that there are several possible sources of error throughout our measurements, including those stemming from our various calibration steps. Previous works have estimated the error of their measurements by repeating several times identical measurements and calculating the error due to repeatability.21 This, however, is very time consuming, especially since each sample characterization that we performed in the TGA-DSC lasted four days. We instead considered that the main source of error in our measurements is that due to the selection of a heat flow baseline. That is, for all our measurements and after sorption had finalized, a nonzero heat flow value was recorded, which corresponded to our baseline. This nonzero heat flow was substracted from the heat flow measurement throughout the entire sorption process. Ultimately, the heat flow measurement with the baseline substracted was integrated over time and divided by the entire mass absorbed to calculate the enthalpy.

Critically, we note that the baseline heat flow exhibited fluctuations from its average value. Depending on which value was chosen the integrated enthalpy exhibited changes of ~100 kJ/kg. We, therefore, chose to use the average value of the heat flow after sorption as our baseline and considered this difference of 100 kJ/kg as our error. This value is in line with errors reported in previous literature of sorption enthalpy measurements of hydrogel-salt composites following similar thermogravimetric-calorimetry approaches.22

An additional potential error source is the convective heat flow between the TGA-DSC chamber and the sample due to the small temperature difference between the chamber and sample. If the sample is hotter than its surrounding, then it will convectively lose heat, leading to lower enthalpy measurements. To minimize these effects, all our measurements used a TGA-DSC pan that was sealed with a lid. We punched a small number of holes through the lid (~10-13) that served as vapor pathways into the sample inside the pan. These holes allowed to slow down the absorption process, leading to an almost isothermal operation with temperature variations during absorption of ~0.01°C. We can estimate the convective heat transfer between the pan and the ambient, , as

|  | (S42) |
| --- | --- |

where is the convective heat transfer coefficient between chamber and pan, is the surface area of the pan, and is the temperature difference between the pan and the ambient. We estimate , m2, and to estimate the heat transfer as mW. This heat flow is lower than the measurements during absorption >1 mW. However, this estimation suggests that for high temperature differences between pan and chamber it is possible that the convective heat flow can lead to an error in the measured enthalpies.

**References**

(1) Gao, Y.; Cho, H. J. Quantifying the Trade-off between Stiffness and Permeability in Hydrogels. *Soft Matter* **2022**, *18* (40), 7735–7740. https://doi.org/10.1039/D2SM01215D.

(2) Chen, G. Thermodynamics of Hydrogels for Applications in Atmospheric Water Harvesting, Evaporation, and Desalination. *Physical Chemistry Chemical Physics* **2022**, *24* (20), 12329–12345. https://doi.org/10.1039/D2CP00356B.

(3) Flory, P. J. *Principles of Polymer Chemistry*; Cornell University Press: Ithaca, N. Y., 1953.

(4) Atkins, P.; de Paula, J. *Atkins’ Physical Chemistry*; W. H. Freeman and Company: New York, 2006. https://doi.org/10.1016/j.electacta.2006.09.003.

(5) Rubinstein, M.; Colby, R. H. *Polymer Physics*; Oxford University Press, 2003.

(6) Bouklas, N.; Huang, R. Swelling Kinetics of Polymer Gels: Comparison of Linear and Nonlinear Theories. *Soft Matter* **2012**, *8* (31), 8194–8203. https://doi.org/10.1039/C2SM25467K.

(7) Li, R.; Shi, Y.; Wu, M.; Hong, S.; Wang, P. Photovoltaic Panel Cooling by Atmospheric Water Sorption–Evaporation Cycle. *Nat Sustain* **2020**, *3* (8), 636–643. https://doi.org/10.1038/s41893-020-0535-4.

(8) Graeber, G.; Díaz-Marín, C. D.; Gaugler, L. C.; Zhong, Y.; Fil, B. El; Liu, X.; Wang, E. N. Extreme Water Uptake of Hygroscopic Hydrogels through Maximized Swelling-Induced Salt Loading. *Advanced Materials* **2023**, 2211783. https://doi.org/10.1002/ADMA.202211783.

(9) Stølen, S.; Grande, T. *Chemical Thermodynamics of Materials*, 1st Edition.; John Wiley and Sons, 2003.

(10) Díaz-Marín, C. D.; Lu, Z.; Hector, K. E.; Roper, M. A.; Graeber, G.; Liu, X.; Gaugler, L. C.; Zhang, L.; Fil, B. El; Grossman, J. C. EFFECT OF POLYMER NETWORK ON SORPTION MASS TRANSFER IN HYGROSCOPIC HYDROGELS. *International Heat Transfer Conference 17* **2023**, 9. https://doi.org/10.1615/IHTC17.10-10.

(11) Conde, M. R. Properties of Aqueous Solutions of Lithium and Calcium Chlorides: Formulations for Use in Air Conditioning Equipment Design. *International Journal of Thermal Sciences* **2004**, *43* (4), 367–382. https://doi.org/10.1016/J.IJTHERMALSCI.2003.09.003.

(12) Díaz-Marín, C. D.; Deshmukh, A.; Roper, M. A.; Lienhard, J. H.; Chen, G. Dynamic Water Absorption-Desorption by Aqueous Salt Solutions. *Cell Rep Phys Sci* **2024**, *0* (0), 101929. https://doi.org/10.1016/J.XCRP.2024.101929.

(13) Mills, A. F. *Heat and Mass Transfer*; McGraw-Hill: New York, N. Y., 1994.

(14) Palacios-Bereche, R.; Gonzales, R.; Nebra, S. A. Exergy Calculation of Lithium Bromide–Water Solution and Its Application in the Exergetic Evaluation of Absorption Refrigeration Systems LiBr-H2O. *Int J Energy Res* **2012**, *36* (2), 166–181. https://doi.org/10.1002/ER.1790.

(15) Díaz-Marín, C. D.; Zhang, L.; Lu, Z.; Alshrah, M.; Grossman, J. C.; Wang, E. N. Kinetics of Sorption in Hygroscopic Hydrogels. *Nano Lett* **2022**, *22* (3), 1100–1107. https://doi.org/10.1021/ACS.NANOLETT.1C04216/SUPPL_FILE/NL1C04216_SI_001.PDF.

(16) El Fil, B.; Li, X.; Díaz-Marín, C. D.; Zhang, L.; Jacobucci, C. L. Significant Enhancement of Sorption Kinetics via Boiling-Assisted Channel Templating. *Cell Rep Phys Sci* **2023**, 101549. https://doi.org/10.1016/J.XCRP.2023.101549.

(17) Aristov, Y. I.; Sapienza, A.; Ovoshchnikov, D. S.; Freni, A.; Restuccia, G. Reallocation of Adsorption and Desorption Times for Optimisation of Cooling Cycles. *International Journal of Refrigeration* **2012**, *35* (3), 525–531. https://doi.org/10.1016/J.IJREFRIG.2010.07.019.

(18) *Indium - Element information, properties and uses | Periodic Table*. https://www.rsc.org/periodic-table/element/49/indium (accessed 2024-02-12).

(19) *Phenyl salicylate | C13H10O3 | CID 8361 - PubChem*. https://pubchem.ncbi.nlm.nih.gov/compound/Phenyl-salicylate#section=Boiling-Point (accessed 2024-02-12).

(20) *Isopropyl Alcohol*. https://webbook.nist.gov/cgi/cbook.cgi?ID=C67630&Mask=4 (accessed 2024-02-12).

(21) Kim, H.; Cho, H. J.; Narayanan, S.; Yang, S.; Furukawa, H.; Schiffres, S.; Li, X.; Zhang, Y. B.; Jiang, J.; Yaghi, O. M.; Wang, E. N. Characterization of Adsorption Enthalpy of Novel Water-Stable Zeolites and Metal-Organic Frameworks. *Scientific Reports 2016 6:1* **2016**, *6* (1), 1–8. https://doi.org/10.1038/srep19097.

(22) Lu, H.; Shi, W.; Zhang, J. H.; Chen, A. C.; Guan, W.; Lei, C.; Greer, J. R.; Boriskina, S. V.; Yu, G. Tailoring the Desorption Behavior of Hygroscopic Gels for Atmospheric Water Harvesting in Arid Climates. *Advanced Materials* **2022**, *34* (37), 2205344. https://doi.org/10.1002/ADMA.202205344.
